# Supplementary material for: A compact and low-cost miniaturized analysis system composed of microchip electrophoresis and chemiluminescence detection manipulated by a simple subatmospheric pressure fluid-driven device
Source: Royal Society of Chemistry journal article supplement (doi:10.1039/c005216g), 2010-01-01
Supplement: c005216g.pdf [file c005216g.pdf]

A Compact and Low-cost Micro-total Analysis System Composed of Microchip Electrophoresis and Chemiluminescence Detection Manipulated by a Simple Subatmospheric Pressure Fluid-Driven Device

**Table S-1.** Peak height(h) and peak height enhancements (En) of metal ions with different sample loading time

| Ions             | 0.5s |      | 1.0s  |      | 2.0s  |      | Linear correlation coefficient (R <sup>2</sup> ) |
|------------------|------|------|-------|------|-------|------|--------------------------------------------------|
|                  | h/mV | En   | h/mV  | En   | h/mV  | En   |                                                  |
| Cr <sup>3+</sup> | 6.97 | 1.99 | 13.52 | 1.99 | 28.50 | 4.09 | 0.9992                                           |
| Mn <sup>2+</sup> | 5.39 | 1.98 | 10.06 | 1.98 | 22.01 | 4.08 | 0.9976                                           |
| Co <sup>2+</sup> | 8.85 | 1.99 | 17.80 | 1.99 | 35.29 | 3.99 | 0.9999                                           |
| Cu <sup>2+</sup> | 6.14 | 1.98 | 12.10 | 1.98 | 24.41 | 3.98 | 0.9999                                           |
| Ni <sup>2+</sup> | 4.52 | 1.98 | 8.94  | 1.98 | 17.60 | 3.89 | 0.9999                                           |
| Zn <sup>2+</sup> | 4.25 | 1.97 | 8.40  | 1.97 | 16.40 | 3.86 | 0.9997                                           |
| Au <sup>3+</sup> | 6.84 | 1.96 | 13.40 | 1.96 | 26.40 | 3.86 | 0.9998                                           |
| Pt <sup>2+</sup> | 4.28 | 1.95 | 9.32  | 1.95 | 16.40 | 3.83 | 0.9942                                           |
| Pb <sup>2+</sup> | 3.27 | 1.94 | 7.28  | 1.94 | 12.50 | 3.82 | 0.9916                                           |

**Table S-2.** The effect of resident time on the resolution and separation efficiency at different vacuum applied on W reservoir

| Va <sup>a</sup><br>(mbar)       | -4             |                | -8   |       | -12  |       | -18  |       | -24   |       | -30   |        | -36   |        |
|---------------------------------|----------------|----------------|------|-------|------|-------|------|-------|-------|-------|-------|--------|-------|--------|
|                                 | R <sup>c</sup> | N <sup>d</sup> | R    | N     | R    | N     | R    | N     | R     | N     | R     | N      | R     | N      |
| T <sub>R</sub> <sup>b</sup> (s) | 3.00           |                | 2.41 |       | 1.73 |       | 1.30 |       | 1.04  |       | 0.87  |        | 0.72  |        |
| ions                            |                |                |      |       |      |       |      |       |       |       |       |        |       |        |
| Cr <sup>3+</sup>                | 0.00           | 152            | 0.00 | 213   | 0.00 | 870   | 0.00 | 872   | 0.00  | 1630  | 0.00  | 1935   | 0.00  | 3841   |
| Mn <sup>2+</sup>                | 1.50           | 302            | 1.92 | 401   | 3.51 | 611   | 4.37 | 1255  | 9.53  | 5076  | 9.93  | 5357   | 10.49 | 5747   |
| Co <sup>2+</sup>                | 1.30           | 288            | 1.41 | 628   | 2.92 | 2041  | 4.38 | 2055  | 5.22  | 2542  | 5.54  | 5597   | 7.56  | 5952   |
| Cu <sup>2+</sup>                | 0.87           | 592            | 1.39 | 775   | 3.73 | 2362  | 5.13 | 4762  | 5.26  | 17341 | 7.35  | 24793  | 8.35  | 28571  |
| Ni <sup>2+</sup>                | 0.74           | 880            | 1.09 | 1158  | 1.70 | 2326  | 2.44 | 3922  | 4.41  | 16854 | 5.10  | 19108  | 6.23  | 63830  |
| Zn <sup>2+</sup>                | 0.63           | 3319           | 0.86 | 6993  | 2.05 | 7371  | 2.77 | 20979 | 4.34  | 45455 | 5.83  | 54545  | 6.69  | 88235  |
| Au <sup>3+</sup>                | 1.43           | 1485           | 1.96 | 3727  | 6.16 | 12295 | 8.15 | 13216 | 10.56 | 57692 | 15.40 | 71429  | 19.06 | 85714  |
| Pt <sup>2+</sup>                | 1.38           | 4724           | 1.64 | 13333 | 7.01 | 53571 | 7.14 | 60000 | 10.51 | 62500 | 11.05 | 111111 | 11.24 | 120000 |
| Pb <sup>2+</sup>                | 0.86           | 7143           | 1.54 | 13393 | 2.86 | 14423 | 3.45 | 26087 | 3.51  | 27523 | 5.84  | 115385 | 5.93  | 125000 |

<sup>a</sup> Applied vacuum, <sup>b</sup> Resident time, <sup>c</sup> Resolution, <sup>d</sup> Theoretical plate number

**Table S-3.** Analytical results of the tea digest solution

| Metal ions | Found (mol/L)         | Added (mol/L)         | Total Found(mol/L)    | Recovery (%) |
|------------|-----------------------|-----------------------|-----------------------|--------------|
| Mn(II)     | $1.89 \times 10^{-6}$ | $2.00 \times 10^{-6}$ | $3.92 \times 10^{-6}$ | 101.5        |
| Co(II)     | $3.64 \times 10^{-8}$ | $4.00 \times 10^{-8}$ | $7.55 \times 10^{-8}$ | 97.8         |
| Cu(II)     | $3.03 \times 10^{-8}$ | $3.00 \times 10^{-8}$ | $6.10 \times 10^{-8}$ | 102.3        |
| Zn(II)     | $4.25 \times 10^{-7}$ | $4.00 \times 10^{-7}$ | $8.15 \times 10^{-7}$ | 97.5         |
| Pb(II)     | $3.34 \times 10^{-7}$ | $3.00 \times 10^{-7}$ | $6.25 \times 10^{-7}$ | 97.0         |

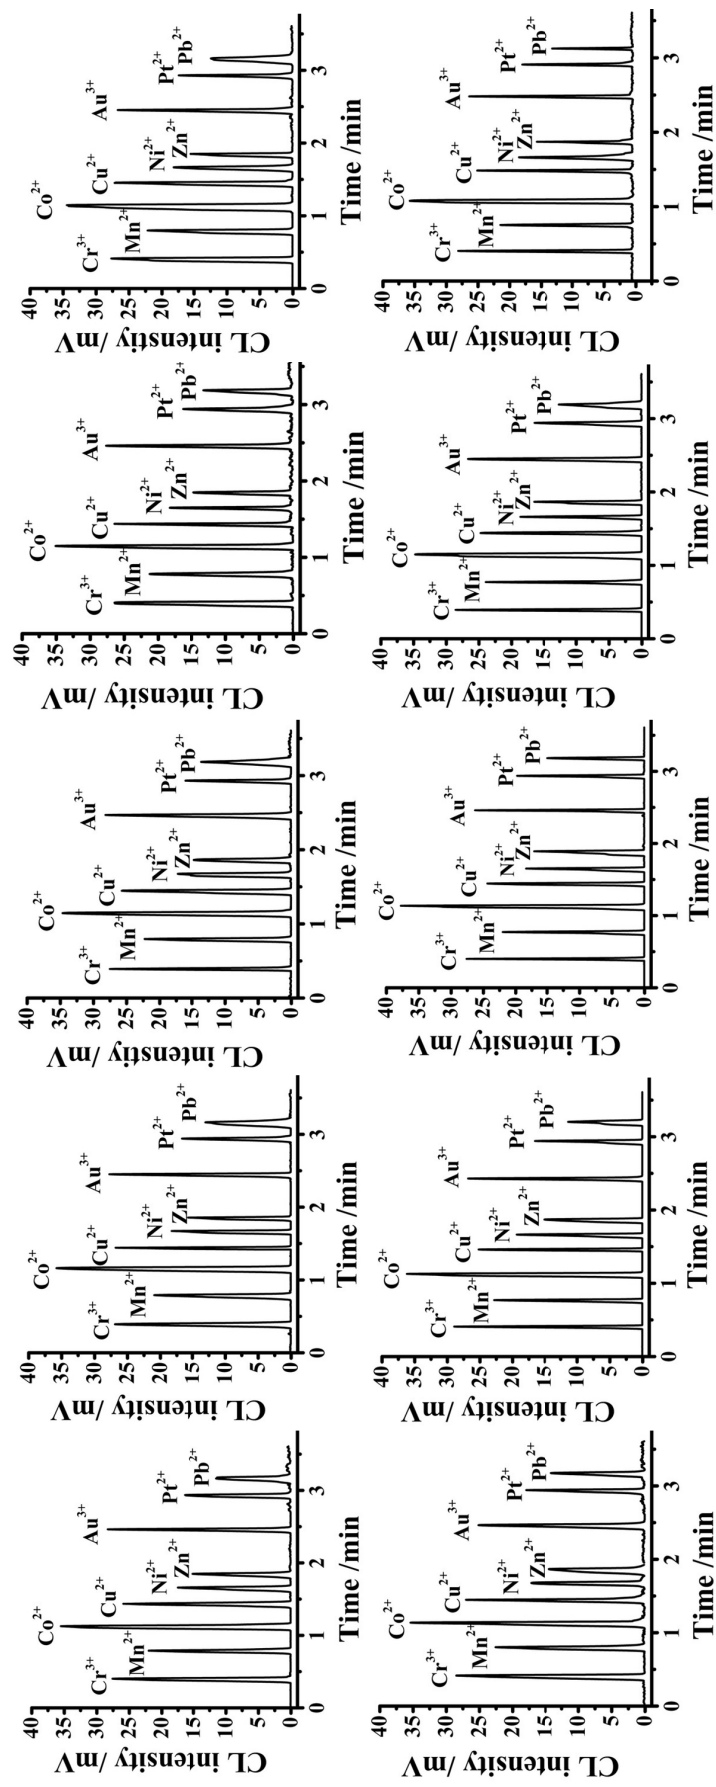

**Figure S-1.** Electrochromatograms of separation and detection of nine metal ions based on ten replicate injections to show the reproducibility of the proposed MCE-CL system. For other conditions, see Fig 7.
